# Supplementary material for: The Generation of an Artificial ATP Deficit Triggers Antibiotic Production in Streptomyces lividans
Source: MDPI journal article supplement (doi:10.3390/antibiotics11091157), 2022-08-27
Supplement: s1 [file s1]

# Supplementary Materials:

**Table S1** Oligonucleotides used in this study¶

| Purpose□                                                  | Sequence□                             |
|-----------------------------------------------------------|---------------------------------------|
| <b>Internal deletion of 36bp in <i>atpD</i></b> □         |                                       |
| NS1¶                                                      | 5'-GATCGGTCTGCAGGAGATGATCTACCGCGT-3'· |
| NS2¶                                                      | 3'-TCCCGCCGTTCTAGCCAGACGTCTCTACT-5'¶  |
| <b>Primers for RT-PCR (Figure 3)¶</b>                     |                                       |
| □                                                         | □                                     |
| <i>HrdB</i> forward¶                                      | 5'-AAGGAAGACGGCGAGCTTCT-3'¶           |
| <i>HrdB</i> reverse¶                                      | 5'-GCACCGGGATACGGATGGTG-3'¶           |
| <i>CpkA</i> forward¶                                      | 5'-AGGTCGGTCTGGTCGAGTTGT-3'¶          |
| <i>CpkA</i> reverse· ¶                                    | 5'-CGCACAAGAACTCCAGCATGA-3'¶          |
| <i>CdaR</i> forward¶                                      | 5'-ACTCGCTCCGTTTCGAACAACT-3'¶         |
| <i>CdaR</i> reverse· ¶                                    | 5'-GAGGTCGGTACCCAGTTCAAGA-3'¶         |
| <i>Cda</i> PSI forward· ¶                                 | 5'-GGCTTCCTCTTCCTCAACCTGT-3'¶         |
| <i>Cda</i> PSI reverse· ¶                                 | 5'-ACGTACAGCTCGGTCAGTTCT-3'¶          |
| <i>RedD</i> forward¶                                      | 5'-CAACATATTGGGACCCGTATCG-3'¶         |
| <i>RedD</i> reverse· ¶                                    | 5'-ATCGCGCTGATGAGATCCTC-3'¶           |
| <i>RedL</i> forward¶                                      | 5'-AGCCGAGATAGCACGGTTCATC-3'¶         |
| <i>RedL</i> reverse· ¶                                    | 5'-AGATGCCGGTGGAGAAGATGTG-3'¶         |
| <i>ActII-ORF4</i> forward¶                                | 5'-GTGTCCATGTAATCACCGATGC-3'¶         |
| <i>ActII-ORF4</i> reverse· ¶                              | 5'-AATTACCAGGGACCGGAGTTCC-3'¶         |
| <i>ActII-ORF1</i> forward¶                                | 5'-TGAAGCGCAGAGTCGTCATCAC-3'¶         |
| <i>ActII-ORF1</i> reverse¶                                | 5'-ACCAGGTAGTCGAACATGTGCC-3'¶         |
| <b>Primer PCR (Figure S1)¶</b>                            |                                       |
| Within promoter <i>ErmE</i> * upstream of <i>atpA</i> · ¶ |                                       |
| 5'-GACGGTATCGATAAGCTTGC-3'¶                               |                                       |
| <i>atpA</i> reverse· ¶                                    |                                       |
| 5'-TCCTCGATGCCGCTGAACT--3'¶                               |                                       |
| <b>Primers for RT-PCR (Figure S2)□</b>                    |                                       |
| NRPS/SCO6431 forward· . . . . .                           | 5'-GGCGTTCATCTTCTACACCTCC-3'¶         |
| NRPS/SCO6431 reverse· . . . . .                           | 5'-AGTCCGTAGACGTTGAACAGCC-3'¶         |
| EizA/SCO5222 forward· . . . . .                           | 5'-ATATGCCGACGGTCTGTGCTAC-3'¶         |
| EizA/SCO5222 reverse· . . . . .                           | 5'-TGAGCAGAGGTCGTTGTACCAG-3'¶         |
| CpkA/SCO6275 forward· . . . . .                           | 5'-AGGTCGGTCTGGTCGAGTTGT-3'¶          |
| CpkA/SCO6275 reverse· . . . . .                           | 5'-CGCACAAGAACTCCAGCATGA-3'¶          |
| CrtE/SCO0185 forward· . . . . .                           | 5'-ACCTTGAAGAGCGCCCTGTA-3'¶           |
| CrtE/SCO0185 reverse· . . . . .                           | 5'-AGGCTCATGTCCGTCAGCTC-3'¶           |
| CchH/SCO0492 forward· . . . . .                           | 5'-CAGCTTCTCCACCTGACGGTAA-3'¶         |
| CchH/SCO0492 reverse· . . . . .                           | 5'-CGCTTCTCTCGTACGGCTTTCT-3'¶         |

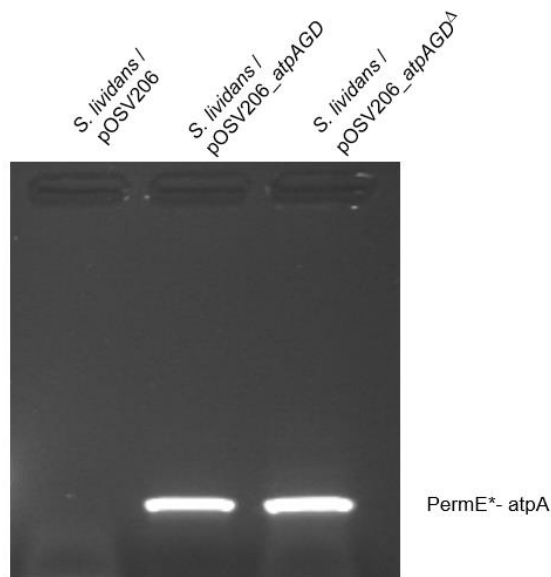

**Figure S1:** Determination by RT-PCR of the level of transcription of the *atpAGD* cluster present on the plasmid pOSV260 in *S. lividans*/pOSV206\_ *atpAGD* and *S. lividans*/pOSV206\_ *atpAGD*<sup>Δ</sup>, grown on solid HT medium for 48 h, with specific primers designed to amplify specifically the copy of the *atpAGD* cluster carried by the plasmid and not the genomic copy of this cluster (Table S1).

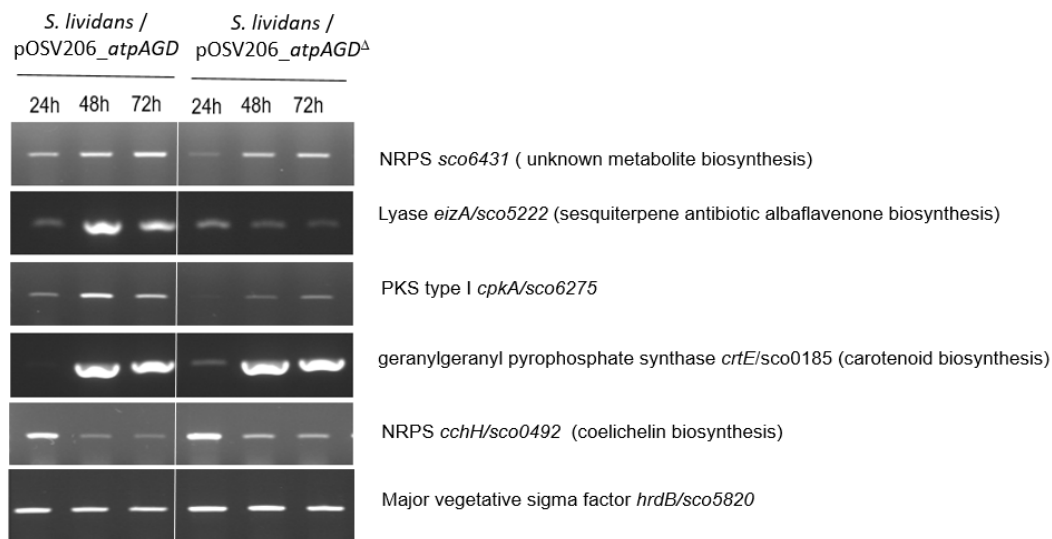

**Figure S2:** Determination by RT-PCR of the level of expression of genes belonging to various specialized metabolite biosynthetic pathways in *S. lividans*/pOSV206\_ *atpAGD* and *S. lividans*/pOSV206\_ *atpAGD*<sup>Δ</sup>, grown on solid HT medium for 48 h, using the primers specific to each gene listed in Table S1. These include the NRPS *sco6431*, *eizA/sco5222* involved in the biosynthesis of albaflavenone, *cpkA/sco6275* encoding a PKS of type I involved in the biosynthesis of a cryptic yellow polyketide, *crtE/sco0185* involved in carotenoid biosynthesis and that of the NRPS *cchH/sco0492* involved in coelichelin biosynthesis. *hrdB/sco5820* PCR amplification was used as internal control.
